# Supplementary material for: Photocatalytic Degradation of Losartan with Bismuth Oxychloride: Batch and Pilot Scale Demonstration
Source: MDPI journal article supplement (doi:10.3390/catal13081175), 2023-07-31
Supplement: s1 [file s1]

# Photocatalytic degradation of Losartan with bismuth oxychloride: batch and pilot scale demonstration

Konstantinos Kouvelis<sup>1</sup>, Alexandra A. Ioannidi<sup>1</sup>, Athanasia Petala<sup>2</sup>, Manolis Souliotis<sup>3</sup> and Zacharias Frontistis<sup>3\*</sup>

## Supplementary Material

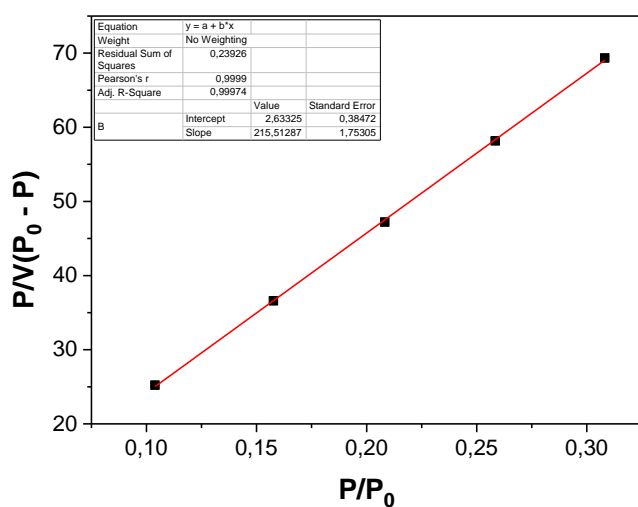

Figure S1. BET analysis.

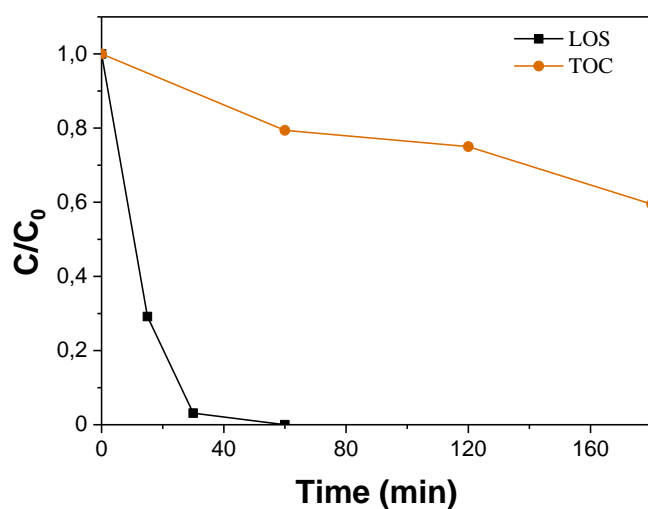

Figure S2. TOC and LOS removal efficiency. 4.8 mg/L LOS, 500 mg/L BiOCl under simulated solar irradiation.
